# Supplementary material for: A mimetic, semi-implicit, forward-in-time, finite volume shallow water model: comparison of hexagonal–icosahedral and cubed-sphere grids
Source: Copernicus journal article supplement (doi:10.5194/gmd-7-909-2014), 2014-05-20
Supplement: Supplementary file 2 [file supplement-cover-letter.pdf › supplement-cover-letter.pdf]

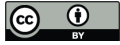

## *Supplement of*

# **A mimetic, semi-implicit, forward-in-time, finite volume shallow water model: comparison of hexagonal–icosahedral and cubed-sphere grids**

**J. Thuburn et al.**

*Correspondence to:* J. Thuburn ([j.thuburn@exeter.ac.uk](mailto:j.thuburn@exeter.ac.uk)) and C. J. Cotter ([colin.cotter@imperial.ac.uk](mailto:colin.cotter@imperial.ac.uk))

- Supplement-Cover-Letter.pdf
- buildop\_cube.f90
- buildop\_hex.f90
- dodecahedron.xref
- dualgrid\_cube.dat
- dualgrid\_hex.dat
- findevals2.m
- gengrid\_cube.f90
- gengrid\_hex.f
- join.m
- jtaxes.m
- jtcontour.m
- jtplotgrid.m
- jtrotplot.m
- mimetic\_usernotes.pdf
- mimeticswe.f90
- plotdiag.m
- primalgrid\_cube.dat
- primalgrid\_hex.dat
- swenml.in
